# Supplementary material for: The impact of vertebral fractures on pulmonary function tests in patients with interstitial lung disease. A cross-sectional study
Source: Research Square preprint supplement (doi:10.21203/rs.3.rs-8354433/v1), 2025-12-22
Supplement: Supplementary file 1 [file fe5e33be092bebee968a6c58.docx]

**Supplementary tables**

| **FVC, milliliters** | | | |
| --- | --- | --- | --- |
| **Variable** | **Estimate (β)** | **95% CI** | **p-value** |
| Intercept | 713.84 | [-156.49; 1584.17] | 0.10 |
| **SDI** | **-95.64** | **[-171.20; -20.08]** | **0.013** |
| HRCT pattern: UIP/UIP-like | Ref | Ref |  |
| HRCT pattern: NSIP | 219.22 | [-40.82; 497.27] | 0.097 |
| HRCT pattern: Other | 210.03 | [-316.70; 736.75] | 0.43 |
| DISH/OA (present) | -26.53 | [-256.75; 203.68] | 0.82 |
| Age | -4.27 | [-13.69; 5.14] | 0.37 |
| **Sex (Male)** | **904.23** | **[650.03; 1158.43]** | **<0.001** |
| **AOST (mm)** | **12.34** | **[1.34; 23.33]** | **0.028** |
| **ROFPRD (mm)** | **8.96** | **[3.79; 14.13]** | **<0.001** |
| LOFPRD (mm) | 4.06 | [-0.89; 9.02] | 0.10 |
| **TLC, milliliters** | | | |
| **Variable** | **Estimate (β)** | **95% CI** | **p-value** |
| Intercept | 59.39 | [-1352.01; 1471.08] | 0.933 |
| **SDI** | **-199.46** | **[-332.35; -76.57]** | **0.001** |
| HRCT pattern: UIP/UIP-like | Ref. | Ref. |  |
| **HRCT pattern: NSIP** | **511.56** | **[95.45; 927.67]** | **0.016** |
| HRCT pattern: Other | 165.37 | [-667.36; 1000.10] | 0.69 |
| DISH/OA | -114.83 | [-491.66; 261.98] | 0.54 |
| Age | 7.31 | [-7.77; 22.41] | 0.40 |
| **Sex (Male)** | **1069.60** | **[655.33; 1483.85]** | **<0.001** |
| AOST (mm) | 7.71 | [-10.47; 25.89] | 0.40 |
| **ROFPRD (mm)** | **14.52** | **[6.00; 23.04]** | **<0.001** |
| LOFPRD (mm) | 10.76 | [2.177; 19.35] | 0.14 |
| **ppFEV1** | | | |
| **Variable** | **Estimate (β)** | **95% CI** | **p-value** |
| Intercept | 31.41 | [6.84; 55.98] | 0.12 |
| SDI | -0.57 | [-2.67; 1.52] | 0.59 |
| HRCT pattern: UIP/UIP-like | Ref. | Ref. |  |
| HRCT pattern: NSIP | 0.11 | [-7.11; 7.34] | 0.97 |
| HRCT pattern: Other | 0.46 | [-12.75; 13.68] | 0.94 |
| DISH/OA | -1.22 | [-7.60; 5.15] | 0.70 |
| **Age** | **0.59** | **[0.33; 0.86]** | **<0.001** |
| **Sex (Male)** | **-12.32** | **[-19.56; -5.11]** | **<0.001** |
| AOST (mm) | -0.02 | [-0.34; 0.29] | 0.089 |
| **ROFPRD (mm)** | **0.19** | **[0.04; 0.34]** | **0.01** |
| LOFPRD (mm) | 0.07 | [-0.07; 0.21] | 0.34 |

**Supplementary table 1**. Multiple linear regression models examining the association between the spinal deformity index (SDI) and pulmonary function parameters. Separate models were fitted for absolute forced vital capacity (FVC), absolute total lung capacity (TLC) and percent-predicted Forced expiratory volume (FEV1). Estimates are reported as regression coefficients (β) with 95% confidence intervals (CI) and corresponding p-values.
